# Supplementary material for: Transdermal delivery of therapeutics through dissolvable gelatin/sucrose films coated on PEGDA microneedle arrays with improved skin permeability
Source: Royal Society of Chemistry journal article supplement (doi:10.1039/c9tb01994d), 2019-01-01
Supplement: c9tb01994d1.pdf [file c9tb01994d1.pdf]

## Supporting Information

### **Therapeutics transdermal delivery through dissolvable gelatin/sucrose film coated on PEGDA microneedle array with improved skin permeability**

Ya Gao,<sup>ab</sup> Mengmeng Hou,<sup>ab</sup> Ruihao Yang,<sup>ab</sup> Lei Zhang,<sup>c</sup> Zhigang Xu,<sup>ab</sup> Yuejun Kang<sup>ab\*</sup> and Peng Xue <sup>ab\*</sup>

a Key Laboratory of Luminescent and Real-Time Analytical Chemistry (Southwest University), Ministry of Education, School of Materials and Energy, Southwest University, Chongqing 400715, China.

b Chongqing Engineering Research Center for Micro-Nano Biomedical Materials and Devices, Southwest University, Chongqing 400715, China.

c Institute of Sericulture and Systems Biology, Southwest University, Chongqing 400716, China.

Corresponding authors

[xuepeng@swu.edu.cn](mailto:xuepeng@swu.edu.cn) (P. Xue), [yjkang@swu.edu.cn](mailto:yjkang@swu.edu.cn) (Y. Kang)

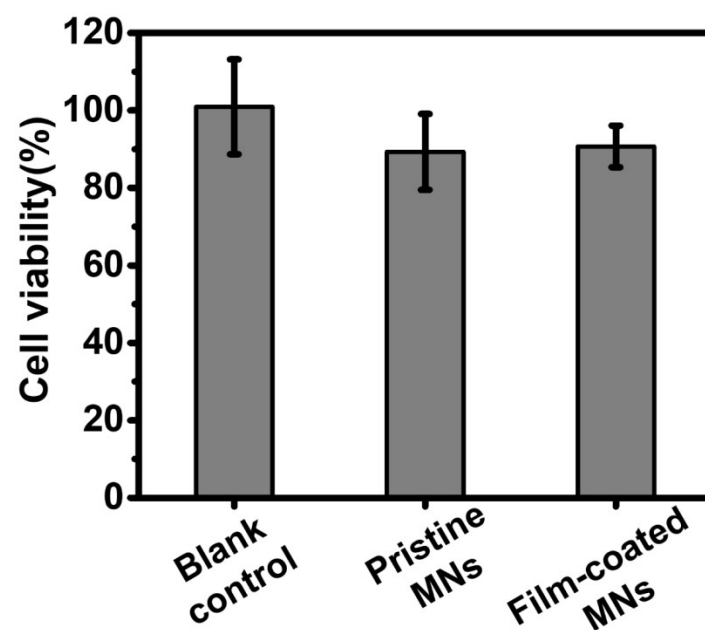

**Figure S1.** Viability of HUVECs after incubation with the soaking solution of microneedle patch (0.5 cm<sup>2</sup>) for 24 h.

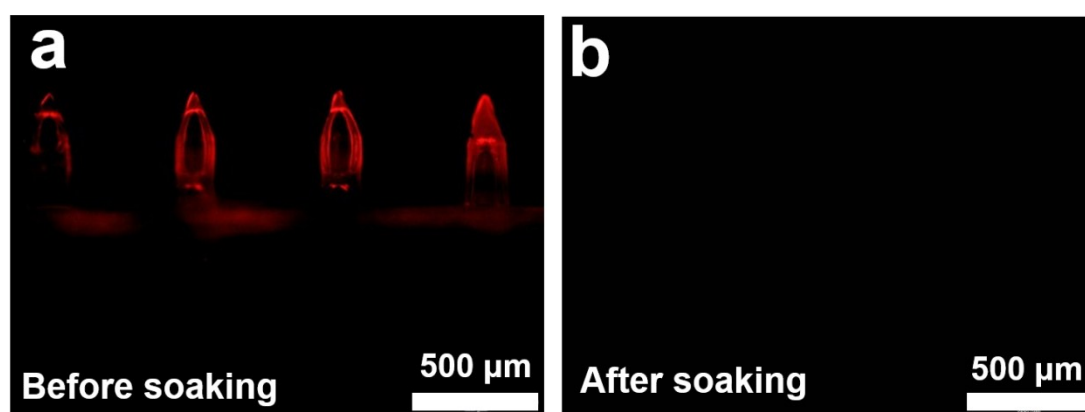

**Figure S2.** Fluorescence images of RhB/film-coated microneedles (a) before and (b) after incubation in DI water for 24 h.

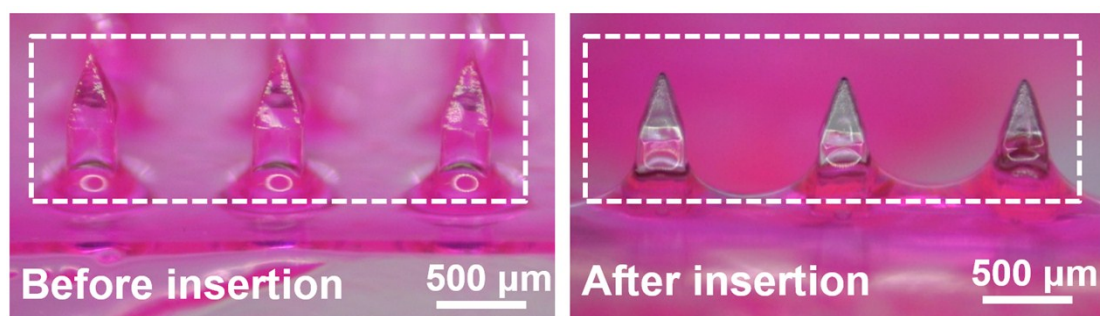

**Figure S3.** Bright field images of RhB/film-coated microneedles before and after the insertion into porcine skin.

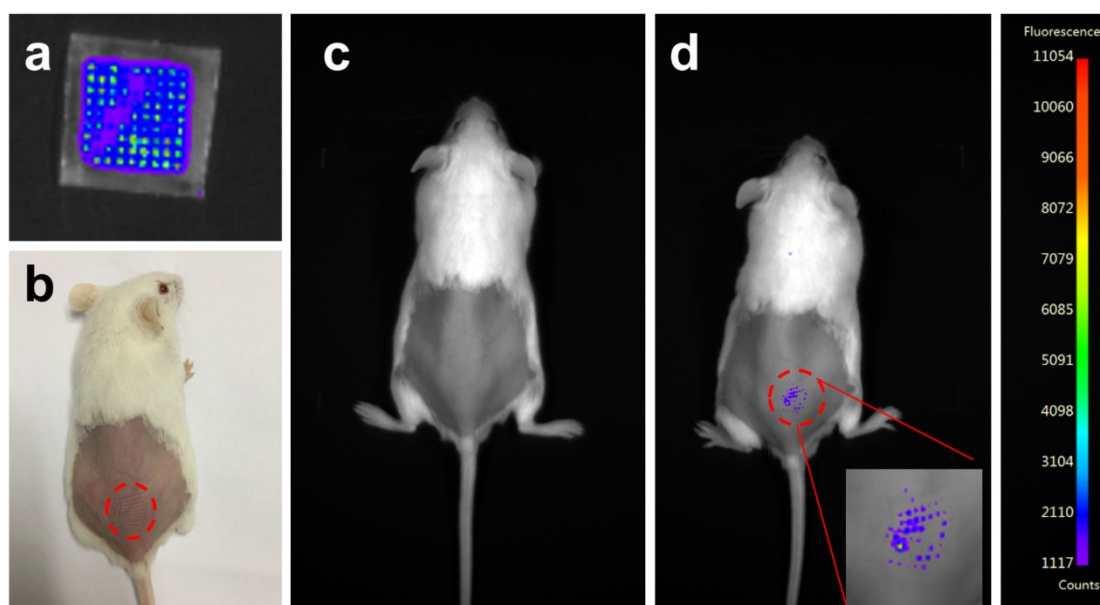

**Figure S4.** RhB/film-coated microneedles for skin penetration on a live mouse model. (a) Fluorescence image of a RhB/film-coated microneedle patch; (b) a live mouse with hair-shaved back skin for microneedle insertion; *in vivo* fluorescence images of the mouse (c) before and (d) after treatment with RhB/film-coated microneedles for 5 min.

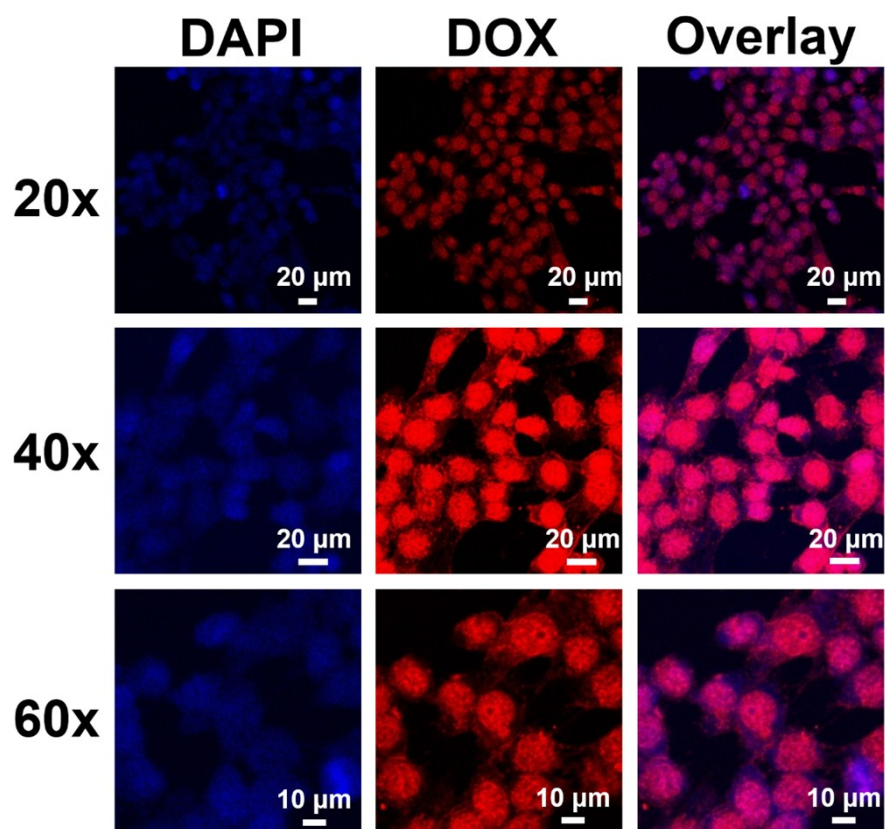

**Figure S5.** Fluorescence images of 4T1 cells after incubation with the soaking solution of DOX/film-coated microneedles for 4 h under various magnifications.
